# Supplementary material
Source: publisher figshare collection journal article supplement (https://gsapubs.figshare.com/articles/dataset/_/16652782)
Supplement: Supplementary file 1 [file 1]

Pengsheng Dong, Guochen Dong, M. Santosh, Xuanxue Mo, Peng Wang, Huawei Li, Jiahui Tang, Lin Su, Zhuanrong Sun, and Yanick Blaise Ketchaya, 2021, Multiple sources and magmatic evolution of the Late Triassic Daocheng batholith in the Yidun Terrane: Implications for evolution of the Paleo-Tethys Ocean in the eastern Tibetan Plateau: GSA Bulletin, <https://doi.org/10.1130/B35970.1>.

## Supplemental Material

**Table S1.** Mineral association of samples from the Daocheng batholith.

**Table S2.** LA-ICP-MS U-Pb isotopic data for zircons from the Daocheng batholith.

**Table S3.** Hf isotopic data for zircons from the Daocheng batholith.

**Table S4.** Trace elements data for zircons from the Daocheng batholith.

**Table S5.** Major and trace elements data for the Daocheng batholith.

**Table S6.** Whole-rock Sr-Nd isotopic data of the Daocheng batholith.

**Table S7.** Representative microprobe analyses of amphibole from the Daocheng batholith.

**Table S8.** Partition coefficient for minerals used in geochemical modeling.
